# Supplementary material
Source: Springer Nature journal article supplement (https://www.springermedizin.de/resource/supplementary/12889_2009_1768_MOESM2_ESM.pdf/9503958)

**ROC Curve**

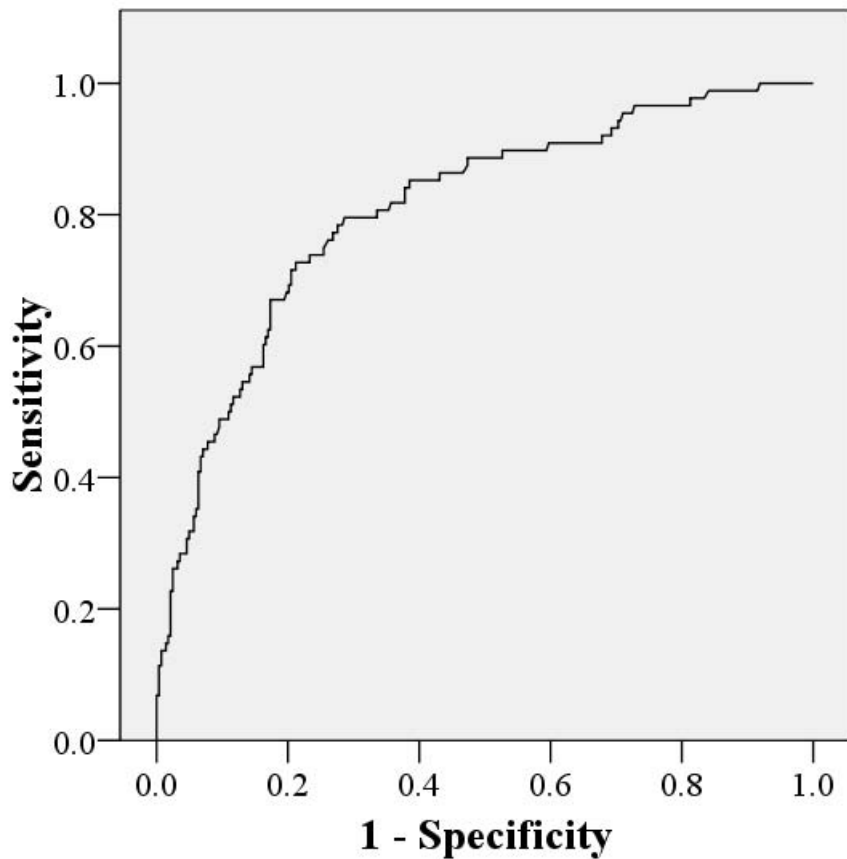

Supplement: MOESM2 [file 9503958]
